# Supplementary material for: How many reptile and amphibian species are in Uganda, and why it matters for global biodiversity conservation
Source: PeerJ. 2025 Jan 2;13:e18704. doi: 10.7717/peerj.18704 (PMC11700488; doi:10.7717/peerj.18704)
Supplement: Supplemental Information 1 — Species lists for amphibians and reptiles that were used in analyses. Lists were cleaned using a standardized approach (see Methods). [file peerj-13-18704-s001.xlsx]

## Sheet: Amphibians
Channing & Rodel - 88	AMNH - 86	AmphibiaWeb - 63	iDigBio - 116	IUCN - 84	iNat - 40	GBIF - 119	VertNet - 121
Afrixalus laevis	Afrixalus lacustris	Afrixalus fulvovittatus	Afrixalus fornasini	Afrixalus laevis	Afrixalus laevis	Afrixalus congicus	Afrixalus brachycnemis
Afrixalus orophilus	Afrixalus orophilus	Afrixalus lacustris	Afrixalus fulvovittatus	Afrixalus orophilus	Afrixalus osorioi	Afrixalus dorsalis	Afrixalus congicus
Afrixalus osorioi	Afrixalus osorioi	Afrixalus laevis	Afrixalus laevis	Afrixalus osorioi	Afrixalus quadrivittatus	Afrixalus fulvovittatus	Afrixalus fornasini
Afrixalus quadrivittatus	Afrixalus phantasma	Afrixalus orophilus	Afrixalus orophilus	Afrixalus quadrivittatus	Amnirana albolabris	Afrixalus lacustris	Afrixalus fulvovittatus
Amietia desaegeri	Afrixalus quadrivittatus	Afrixalus osorioi	Afrixalus osorioi	Amietia nutti	Amnirana galamensis	Afrixalus laevis	Afrixalus laevis
Amietia nutti	Amietia nutti	Amietia desaegeri	Afrixalus quadrivittatus	Amietia ruwenzorica	Arthroleptis adelphus	Afrixalus orophilus	Afrixalus orophilus
Amietia ruwenzorica	Amietia ruwenzorica	Amietia nutti	Afrixalus stuhlmanni	Amietia wittei	Arthroleptis adolfifriederici	Afrixalus osorioi	Afrixalus osorioi
Amietia wittei	Amietia wittei	Amietia ruwenzorica	Amietia angolensis	Amnirana albolabris	Arthroleptis poecilonotus	Afrixalus quadrivittatus	Afrixalus quadrivittatus
Amnirana albolabris	Amnirana albolabris	Amnirana albolabris	Amietia delalandii	Amnirana galamensis	Arthroleptis variabilis	Amietia angolensis	Amietia angolensis
Amnirana sp. 'galamensis East'	Amnirana galamensis	Amnirana galamensis	Amietia fuscigula	Arthroleptides dutoiti	Cardioglossa leucomystax	Amietia chapini	Amietia chapini
Arthroleptides dutoiti	Arthroleptides dutoiti	Arthroleptides dutoiti	Amietia nutti	Arthroleptis adolfifriederici	Chiromantis rufescens	Amietia desaegeri	Amietia fuscigula
Arthroleptis adolfifriederici	Arthroleptis adolfifriederici	Arthroleptis adolfifriederici	Amietia ruwenzorica	Arthroleptis poecilonotus	Hemisus guineensis	Amietia fuscigula	Amietia nutti
Arthroleptis schubotzi	Arthroleptis poecilonotus	Arthroleptis poecilonotus	Amnirana albolabris	Arthroleptis schubotzi	Hoplobatrachus occipitalis	Amietia nutti	amietia ruwenzorica
Boulengerula fischeri	Arthroleptis schubotzi	Chiromantis rufescens	Amnirana galamensis	Arthroleptis stenodactylus	Hylambates verrucosus	Amietia ruwenzorica	Amnirana albolabris
Cardioglossa cyaneospila	Arthroleptis stenodactylus	Hemisus guineensis	Amnirana longipes	Cacosternum plimptoni	Hyperolius castaneus	Amnirana albolabris	Amnirana bravana
Chiromantis rufescens	Cacosternum plimptoni	Hildebrandtia ornata	Arthroleptis adolfifriederici	Cardioglossa leucomystax	Hyperolius cinnamomeoventris	Amnirana bravana	Amnirana galamensis
Hemisus guineensis	Cardioglossa cyaneospila	Hoplobatrachus occipitalis	Arthroleptis bivittatus	Chiromantis rufescens	Hyperolius discodactylus	Amnirana galamensis	Amnirana longipes
Hemisus marmoratus	Cardioglossa leucomystax	Hyperolius balfouri	Arthroleptis poecilonotus	Hemisus guineensis	Hyperolius frontalis	Amnirana parkeriana	Amnirana parkeriana
Hildebrandtia ornata	Chiromantis rufescens	Hyperolius benguellensis	Arthroleptis schubotzi	Hemisus marmoratus	Hyperolius howelli	Arthroleptis adelphus	Arthroleptis adolfifriederici
Hoplobatrachus occipitalis	Hemisus guineensis	Hyperolius castaneus	Arthroleptis stenodactylus	Hildebrandtia ornata	Hyperolius kivuensis	Arthroleptis adolfifriederici	Arthroleptis poecilonotus
Hymenochirus boettgeri	Hemisus marmoratus	Hyperolius cinnamomeoventris	Arthroleptis variabilis	Hoplobatrachus occipitalis	Hyperolius kuligae	Arthroleptis poecilonotus	Arthroleptis schubotzi
Hyperolius balfouri	Hildebrandtia ornata	Hyperolius discodactylus	Bufo bufo	Hyperolius balfouri	Hyperolius lateralis	Arthroleptis schubotzi	Arthroleptis stenodactylus
Hyperolius bocagei	Hoplobatrachus occipitalis	Hyperolius kivuensis	Cacosternum boettgeri	Hyperolius castaneus	Hyperolius viridiflavus	Arthroleptis stenodactylus	Arthroleptis variabilis
Hyperolius castaneus	Hylambates verrucosus	Hyperolius kuligae	Chiromantis inexpectatus	Hyperolius cinnamomeoventris	Kassina senegalensis	Arthroleptis sylvaticus	Cacosternum boettgeri
Hyperolius chyrsogaster	Hyperolius balfouri	Hyperolius lateralis	Chiromantis rufescens	Hyperolius discodactylus	Leptopelis calcaratus	Arthroleptis variabilis	Chiromantis rufescens
Hyperolius cinnamomeoventris	Hyperolius bocagei	Hyperolius nasutus	Chiromantis xerampelina	Hyperolius frontalis	Leptopelis christyi	Cacosternum boettgeri	Chiromantis xerampelina
Hyperolius discodactylus	Hyperolius castaneus	Hyperolius ocellatus	Hemisus guineensis	Hyperolius glandicolor	Leptopelis kivuensis	Cardioglossa leucomystax	Hemisus guineensis
Hyperolius frontalis	Hyperolius cinnamomeoventris	Hyperolius viridiflavus	Hildebrandtia ornata	Hyperolius kivuensis	Leptopelis oryi	Chiromantis rufescens	Hildebrandtia ornata
Hyperolius kivuensis	Hyperolius discodactylus	Kassina senegalensis	Hoplobatrachus occipitalis	Hyperolius kuligae	Phrynobatrachus auritus	Hemisus guineensis	Hoplobatrachus occipitalis
Hyperolius kuligae	Hyperolius frontalis	Leptopelis christyi	Hyperolius alticola	Hyperolius langi	Phrynobatrachus dendrobates	Hemisus marmoratus	Hylambates verrucosus
Hyperolius langi	Hyperolius glandicolor	Leptopelis karissimbensis	Hyperolius balfouri	Hyperolius lateralis	Phrynobatrachus natalensis	Hoplobatrachus occipitalis	Hyperolius alticola
Hyperolius lateralis	Hyperolius kivuensis	Leptopelis kivuensis	Hyperolius bayoni	Hyperolius ocellatus	Phrynomantis microps	Hylambates verrucosus	Hyperolius argentovittis
Hyperolius ocellatus	Hyperolius kuligae	Leptopelis oryi	Hyperolius benguellensis	Hyperolius pusillus	Ptychadena anchietae	Hymenochirus boettgeri	Hyperolius balfouri
Hyperolius rwandae	Hyperolius langi	Phlyctimantis verrucosus	Hyperolius castaneus	Hyperolius viridiflavus	Ptychadena nilotica	Hyperolius alticola	Hyperolius bayoni
Hyperolius viridiflavus	Hyperolius lateralis	Phrynobatrachus auritus	Hyperolius cinnamomeoventris	Kassina senegalensis	Ptychadena oxyrhynchus	Hyperolius argentovittis	Hyperolius benguellensis
Kassina senegalensis	Hyperolius ocellatus	Phrynobatrachus dendrobates	Hyperolius concolor	Leptopelis bocagii	Sclerophrys gutturalis	Hyperolius balfouri	Hyperolius bituberculatus
Leptopelis bocagii	Hyperolius parallelus	Phrynobatrachus graueri	Hyperolius discodactylus	Leptopelis christyi	Sclerophrys kisoloensis	Hyperolius bayoni	Hyperolius castaneus
Leptopelis christyi	Hyperolius viridiflavus	Phrynobatrachus natalensis	Hyperolius frontalis	Leptopelis karissimbensis	Sclerophrys regularis	Hyperolius benguellensis	Hyperolius cinnamomeoventris
Leptopelis karissimbensis	Kassina senegalensis	Phrynobatrachus parvulus	Hyperolius glandicolor	Leptopelis kivuensis	Xenopus ruwenzoriensis	Hyperolius bituberculatus	Hyperolius concolor
Leptopelis kivuensis	Leptopelis calcaratus	Phrynobatrachus petropedetoides	Hyperolius horstockii	Leptopelis mackayi	Xenopus victorianus	Hyperolius castaneus	Hyperolius discodactylus
Leptopelis modestus	Leptopelis christyi	Phrynobatrachus rouxi	Hyperolius kivuensis	Leptopelis oryi		Hyperolius chrysogaster	Hyperolius frontalis
Leptopelis oryi	Leptopelis karissimbensis	Phrynobatrachus versicolor	Hyperolius langi	Phlyctimantis verrucosus		Hyperolius cinnamomeoventris	Hyperolius glandicolor
Leptopelis viridis	Leptopelis kivuensis	Ptychadena anchietae	Hyperolius lateralis	Phrynobatrachus acridoides		Hyperolius discodactylus	Hyperolius horstockii
Phlyctimantis verrucosus	Leptopelis oryi	Ptychadena nilotica	Hyperolius marmoratus	Phrynobatrachus auritus		Hyperolius frontalis	Hyperolius kivuensis
Phrynobatrachus auritus	Leptopelis viridis	Ptychadena oxyrhynchus	Hyperolius multicolor	Phrynobatrachus bequaerti		Hyperolius horstockii	Hyperolius langi
Phrynobatrachus bequaerti	Phrynobatrachus acutirostris	Ptychadena porosissima	Hyperolius nasutus	Phrynobatrachus dendrobates		Hyperolius howelli	Hyperolius marmoratus
Phrynobatrachus bullans	Phrynobatrachus auritus	Ptychadena stenocephala	Hyperolius picturatus	Phrynobatrachus graueri		Hyperolius kivuensis	Hyperolius multicolor
Phrynobatrachus dendrobates	Phrynobatrachus bequaerti	Sclerophrys funerea	Hyperolius platyceps	Phrynobatrachus gutturosus		Hyperolius kuligae	Hyperolius nasutus
Phrynobatrachus graueri	Phrynobatrachus dendrobates	Sclerophrys gutturalis	Hyperolius quinquevittatus	Phrynobatrachus mababiensis		Hyperolius langi	Hyperolius picturatus
Phrynobatrachus kakamikro	Phrynobatrachus graueri	Sclerophrys kerinyagae	Hyperolius stuhlmanni	Phrynobatrachus natalensis		Hyperolius lateralis	Hyperolius pleurospilus
Phrynobatrachus natalensis	Phrynobatrachus natalensis	Sclerophrys kisoloensis	Hyperolius tuberilinguis	Phrynobatrachus parvulus		Hyperolius marmoratus	Hyperolius rossii
Phrynobatrachus perpalmatus	Phrynobatrachus petropedetoides	Sclerophrys pusilla	Hyperolius viridiflavus	Phrynobatrachus rouxi		Hyperolius nasutus	Hyperolius smaragdinus
Phrynobatrachus scheffleri	Phrynobatrachus rouxi	Sclerophrys regularis	Incilius luetkenii	Phrynobatrachus scheffleri		Hyperolius platyceps	Hyperolius tuberilinguis
Phrynobatrachus versicolor	Phrynobatrachus scheffleri	Sclerophrys steindachneri	Kassina senegalensis	Phrynobatrachus versicolor		Hyperolius pleurospilus	Hyperolius viridiflavus
Phrynomantis bifasciatus	Phrynobatrachus versicolor	Sclerophrys vittata	Leptopelis aubryi	Poyntonophrynus lughensis		Hyperolius puncticulatus	Hyperolius viridiflavus karissimbiensis
Ptychadena anchietae	Poyntonophrynus lughensis	Sclerophrys xeros	Leptopelis bocagii	Ptychadena anchietae		Hyperolius viridiflavus	Hyperolius viridiflavus pachyderma
Ptychadena chrysogaster	Ptychadena anchietae	Tomopterna cryptotis	Leptopelis christyi	Ptychadena christyi		Hyperolius viridiflavus karissimbiensis	Hyperolius viridiflavus pitmani
Ptychadena christyi	Ptychadena christyi	Xenopus fischbergi	Leptopelis flavomaculatus	Ptychadena chrysogaster		Hyperolius viridiflavus pachyderma	Hyperolius viridiflavus shubotzi
Ptychadena mahnerti	Ptychadena chrysogaster	Xenopus muelleri	Leptopelis karissimbensis	Ptychadena mahnerti		Hyperolius viridiflavus variabilis	Hyperolius viridiflavus variabilis
Ptychadena mascareniensis	Ptychadena mascareniensis	Xenopus ruwenzoriensis	Leptopelis kivuensis	Ptychadena nilotica		Hyperolius xenorhinus	Hyperolius viridiflavus xanthogrammus
Ptychadena nilotica	Ptychadena nilotica	Xenopus vestitus	Leptopelis notatus	Ptychadena oxyrhynchus		Incilius luetkenii	Hypsiboas prasinus
Ptychadena oxyrhynchus	Ptychadena oxyrhynchus	Xenopus victorianus	Leptopelis rugegensis	Ptychadena porosissima		Kassina senegalensis	Incilius luetkenii
Ptychadena perreti	Ptychadena porosissima	Xenopus wittei	Phlyctimantis verrucosus	Ptychadena pumilio		Leptopelis christyi	Leptopelis aubryi
Ptychadena porosissima	Ptychadena pumilio		Phrynobatrachus acridoides	Ptychadena schillukorum		Leptopelis karissimbensis	Leptopelis bocagii
Ptychadena schillukorum	Ptychadena schillukorum		Phrynobatrachus auritus	Ptychadena stenocephala		Leptopelis kivuensis	Leptopelis christyi
Ptychadena stenocephala	Ptychadena stenocephala		Phrynobatrachus bequaerti	Ptychadena taenioscelis		Leptopelis notatus	Leptopelis flavomaculatus
Ptychadena taenioscelis	Ptychadena taenioscelis		Phrynobatrachus dendrobates	Pyxicephalus edulis		Nectophryne batesii	Leptopelis karissimbensis
Schismaderma carens	Schismaderma carens		Phrynobatrachus francisci	Sclerophrys channingi		Phlyctimantis verrucosus	Leptopelis notatus
Sclerophrys funerea	Sclerophrys berghei		Phrynobatrachus graueri	Sclerophrys funerea		Phrynobatrachus auritus	Phlyctimantis verrucosus
Sclerophrys gutturalis	Sclerophrys channingi		Phrynobatrachus intermedius	Sclerophrys kerinyagae		Phrynobatrachus bequaerti	Phrynobatrachus acridoides
Sclerophrys kerinyagae	Sclerophrys funerea		Phrynobatrachus kinangopensis	Sclerophrys kisoloensis		Phrynobatrachus dendrobates	Phrynobatrachus auritus
Sclerophrys kisoloensis	Sclerophrys gutturalis		Phrynobatrachus minutus	Sclerophrys pusilla		Phrynobatrachus graueri	Phrynobatrachus bequaerti
Sclerophrys maculata	Sclerophrys kerinyagae		Phrynobatrachus natalensis	Sclerophrys regularis		Phrynobatrachus minutus	Phrynobatrachus dendrobates
Sclerophrys pusilla	Sclerophrys kisoloensis		Phrynobatrachus parkeri	Sclerophrys steindachneri		Phrynobatrachus natalensis	Phrynobatrachus francisci
Sclerophrys regularis	Sclerophrys pusilla		Phrynobatrachus parvulus	Sclerophrys vittata		Phrynobatrachus parvulus	Phrynobatrachus graueri
Sclerophrys steindachneri	Sclerophrys regularis		Phrynobatrachus perpalmatus	Sclerophrys xeros		Phrynobatrachus petropedetoides	Phrynobatrachus minutus
Sclerophrys vittata	Sclerophrys steindachneri		Phrynobatrachus petropedetoides	Xenopus borealis		Phrynobatrachus plicatus	Phrynobatrachus natalensis
Sclerophrys xeros	Sclerophrys vittata		Phrynobatrachus plicatus	Xenopus fischbergi		Phrynobatrachus scheffleri	Phrynobatrachus parkeri
Tomopterna cryptotis	Sclerophrys xeros		Phrynobatrachus rouxi	Xenopus muelleri		Phrynobatrachus ukingensis	Phrynobatrachus parvulus
Xenopus borealis	Xenopus borealis		Phrynobatrachus scheffleri	Xenopus pygmaeus		Phrynobatrachus versicolor	Phrynobatrachus perpalmatus
Xenopus fischbergi	Xenopus fischbergi		Phrynobatrachus ukingensis	Xenopus ruwenzoriensis		Phrynomantis bifasciatus	Phrynobatrachus petropedetoides
Xenopus fraseri	Xenopus pygmaeus		Phrynobatrachus versicolor	Xenopus vestitus		Phrynomantis microps	Phrynobatrachus plicatus
Xenopus lenduensis	Xenopus ruwenzoriensis		Ptychadena anchietae	Xenopus victorianus		Ptychadena abyssinica	Phrynobatrachus rouxi
Xenopus pygmaeus	Xenopus vestitus		Ptychadena bibroni	Xenopus wittei		Ptychadena anchietae	Phrynobatrachus scheffleri
Xenopus ruwenzoriensis	Xenopus victorianus		Ptychadena christyi			Ptychadena bibroni	Phrynobatrachus ukingensis
Xenopus vestitus	Xenopus wittei		Ptychadena chrysogaster			Ptychadena christyi	Phrynobatrachus versicolor
Xenopus victorianus			Ptychadena floweri			Ptychadena chrysogaster	Ptychadena anchietae
Xenopus wittei			Ptychadena mascareniensis			Ptychadena gribinguiensis	Ptychadena bibroni
			Ptychadena nilotica			Ptychadena mascareniensis	Ptychadena christyi
			Ptychadena oxyrhynchus			Ptychadena nilotica	Ptychadena chrysogaster
			Ptychadena perreti			Ptychadena oxyrhynchus	Ptychadena floweri
			Ptychadena porosissima			Ptychadena perreti	Ptychadena gribinguiensis
			Ptychadena stenocephala			Ptychadena porosissima	Ptychadena hylaea
			Ptychadena superciliaris			Ptychadena stenocephala	Ptychadena mascareniensis
			Rana grayi			Ptychadena superciliaris	Ptychadena nilotica
			Sclerophrys albifrons			Pyxicephalus adspersus	Ptychadena oxyrhynchus
			Sclerophrys camerunensis			Sclerophrys berghei	Ptychadena perreti
			Sclerophrys funereus			Sclerophrys camerunensis	Ptychadena porosissima
			Sclerophrys gutturalis			Sclerophrys funerea	Ptychadena stenocephala
			Sclerophrys kerinyagae			Sclerophrys gutturalis	Ptychadena superciliaris
			Sclerophrys kisoloensis			Sclerophrys kisoloensis	Ptychadena venusta
			Sclerophrys langanoensis			Sclerophrys latifrons	Sclerophrys berghei
			Sclerophrys maculata			Sclerophrys maculata	Sclerophrys funereus
			Sclerophrys regularis			Sclerophrys pusilla	Sclerophrys gutturalis
			Sclerophrys steindachneri			Sclerophrys regularis	Sclerophrys kisoloensis
			Sclerophrys vittata			Sclerophrys steindachneri	Sclerophrys latifrons
			Sclerophrys xeros			Sclerophrys superciliaris	Sclerophrys maculata
			Strongylopus fasciatus			Sclerophrys vittata	Sclerophrys pusilla
			Tomopterna delalandii			Sclerophrys xeros	Sclerophrys regularis
			Xenopus laevis			Xenopus borealis	Sclerophrys steindachneri
			Xenopus muelleri			Xenopus bunyoniensis	Sclerophrys vittata
			Xenopus pygmaeus			Xenopus fraseri	Strongylopus fasciatus
			Xenopus ruwenzoriensis			Xenopus laevis	Tomopterna delalandii
			Xenopus vestitus			Xenopus lenduensis	Xenopus bunyoniensis
			Xenopus victorianus			Xenopus muelleri	Xenopus fraseri
			Xenopus wittei			Xenopus pygmaeus	Xenopus laevis
						Xenopus ruwenzoriensis	Xenopus muelleri
						Xenopus vestitus	Xenopus ruwenzoriensis
						Xenopus victorianus	Xenopus vestitus
							Xenopus victorianus
							Xenopus wittei

## Sheet: Reptiles
Spawls et al 2018 - 178	RepFocus - 185	iDigBio - 190	IUCN - 178	Reptile Database - 175	GBIF - 219	iNaturalist - 86	VertNet - 200
Acanthocercus atricollis	Acanthocercus kiwuensis	Acanthocercus atricollis	Acanthocercus gregorii	Acanthocercus ugandaensis	Acanthocercus atricollis	Acanthocercus atricollis	Acanthocercus atricollis
Adolfus africanus	Acanthocercus ugandaensis	Acanthocercus cyanogaster	Acanthocercus kiwuensis	Adolfus africanus	Acanthocercus cyanogaster	Acanthocercus ugandaensis	Acanthocercus cyanogaster
Adolfus jacksoni	Adolfus africanus	Acanthocercus gregorii	Acanthocercus ugandaensis	Adolfus alleni	Acanthocercus gregorii	Adolfus africanus	Acanthocercus gregorii
Adolfus masavaensis	Adolfus jacksoni	Adolfus africanus	Adolfus africanus	Adolfus jacksoni	Acanthocercus kiwuensis	Adolfus jacksoni	Acanthocercus kiwuensis
Afrotyphlops angolensis	Adolfus masavaensis	Adolfus alleni	Adolfus jacksoni	Afrotyphlops angolensis	Acanthocercus minutus	Afrotyphlops congestus	Acanthocercus ugandaensis
Afrotyphlops brevis	Afrotyphlops angolensis	Adolfus jacksoni	Adolfus masavaensis	Afrotyphlops brevis	Acanthocercus ugandaensis	Afrotyphlops lineolatus	Adolfus africanus
Afrotyphlops congestus	Afrotyphlops brevis	Adolfus masavaensis	Afrotyphlops angolensis	Afrotyphlops congestus	Adolfus africanus	Agama finchi	Adolfus alleni
Afrotyphlops lineolatus	Afrotyphlops congestus	Afrotyphlops angolensis	Afrotyphlops brevis	Afrotyphlops lineolatus	Adolfus alleni	Agama lionotus	Adolfus jacksoni
Afrotyphlops punctatus	Afrotyphlops lineolatus	Afrotyphlops congestus	Afrotyphlops congestus	Afrotyphlops punctatus	Adolfus jacksoni	Aparallactus lunulatus	Adolfus masavaensis
Agama finchi	Afrotyphlops punctatus	Afrotyphlops lineolatus	Afrotyphlops lineolatus	Agama finchi	Adolfus masavaensis	Atheris hispida	Afrotyphlops angolensis
Agama lionotus	Agama finchi	Afrotyphlops punctatus	Afrotyphlops punctatus	Agama lionotus	Afrotyphlops angolensis	Atheris nitschei	Afrotyphlops congestus
Agama rueppelli	Agama lionotus	Agama aculeata	Agama finchi	Amblyodipsas unicolor	Afrotyphlops congestus	Atheris squamigera	Afrotyphlops lineolatus
Amblyodipsas unicolor	Agama rueppelli	Agama distanti	Agama lionotus	Ancylodactylus africanus	Afrotyphlops lineolatus	Bitis arietans	Afrotyphlops punctatus
Ancylodactylus dickersonae	Amblyodipsas unicolor	Agama finchi	Amblyodipsas unicolor	Ancylodactylus dickersonae	Afrotyphlops nanus	Bitis gabonica	Agama agama
Ancylodactylus elgonensis	Ancylodactylus dickersonae	Agama spinosa	Ancylodactylus dickersonae	Ancylodactylus elgonensis	Afrotyphlops punctatus	Bitis nasicornis	Agama elgonis
Ancylodactylus quattuorseriatus	Ancylodactylus elgonensis	Agama wagneri	Ancylodactylus elgonensis	Ancylodactylus quattuorseriatus	Agama agama	Boaedon fuliginosus	Agama finchi
Aparallactus lunulatus	Ancylodactylus quattuorseriatus	Amblyodipsas unicolor	Ancylodactylus quattuorseriatus	Aparallactus jacksonii	Agama colonorum	Boaedon radfordi	Agama hartmanni
Aparallactus modestus	Aparallactus lunulatus	Ancylodactylus africanus	Aparallactus jacksonii	Aparallactus lunulatus	Agama elgonis	Broadleysaurus major	Agama hispida
Atheris acuminata	Aparallactus modestus	Ancylodactylus elgonensis	Aparallactus lunulatus	Aparallactus modestus	Agama finchi	Buhoma depressiceps	Agama lionotus
Atheris hispida	Atheris acuminata	Ancylodactylus quattuorseriatus	Aparallactus modestus	Atheris acuminata	Agama hispida	Causus lichtensteinii	Agama spinosa
Atheris nitschei	Atheris hispida	Aparallactus jacksonii	Atheris acuminata	Atheris hispida	Agama leucerythrolaema	Causus maculatus	Ancylodactylus africanus
Atheris squamigera	Atheris nitschei	Aparallactus lunulatus	Atheris hispida	Atheris nitschei	Agama lionotus	Causus resimus	Ancylodactylus dickersoni
Atractaspis aterrima	Atheris squamigera	Aparallactus modestus	Atheris nitschei	Atheris squamigera	Agama spinosa	Chamaeleo gracilis	Ancylodactylus elgonensis
Atractaspis irregularis	Atractaspis aterrima	Atheris chlorechis	Atheris squamigera	Atractaspis aterrima	Amblyodipsas unicolor	Chamaeleo laevigatus	Ancylodactylus quattuorseriatus
Bitis arietans	Atractaspis irregularis	Atheris hispida	Atractaspis aterrima	Atractaspis irregularis	Ancylodactylus africanus	Congolacerta vauereselli	Aparallactus lunulatus
Bitis gabonica	Bitis arietans	Atheris nitschei	Atractaspis irregularis	Bitis arietans	Ancylodactylus dickersoni	Crocodylus africanus	Aparallactus modestus
Bitis nasicornis	Bitis gabonica	Atheris squamigera	Atractaspis watsoni	Bitis gabonica	Ancylodactylus elgonensis	Crocodylus cowiei	Atheris hispida
Boaedon fuliginosus	Bitis nasicornis	Atractaspis aterrima	Bitis arietans	Bitis nasicornis	Ancylodactylus quattuorseriatus	Crocodylus niloticus	Atheris nitschei
Boaedon olivaceus	Boaedon fuliginosus	Atractaspis irregularis	Bitis gabonica	Boaedon olivaceus	Aparallactus jacksonii	Crocodylus suchus	Atheris squamigera
Boaedon radfordi	Boaedon lineatus	Bitis arietans	Bitis nasicornis	Boaedon radfordi	Aparallactus lunulatus	Crotaphopeltis hotamboeia	Atractaspis irregularis
Bothrophthalmus lineatus	Boaedon olivaceus	Bitis gabonica	Boaedon fuliginosus	Bothrophthalmus lineatus	Aparallactus modestus	Dasypeltis atra	Bitis arietans
Broadleysaurus major	Boaedon radfordi	Bitis nasicornis	Boaedon olivaceus	Buhoma depressiceps	Aparallactus ubangensis	Dendroaspis jamesoni	Bitis gabonica
Buhoma depressiceps	Bothrophthalmus lineatus	Boaedon fuliginosus	Boaedon radfordi	Causus lichtensteinii	Atheris hispida	Dendroaspis kaimosae	Bitis nasicornis
Causus lichtensteinii	Broadleysaurus major	Boaedon lineatus	Bothrophthalmus lineatus	Causus maculatus	Atheris nitschei	Dipsadoboa unicolor	Boaedon fuliginosus
Causus maculatus	Buhoma depressiceps	Boaedon olivaceus	Broadleysaurus major	Causus resimus	Atheris squamigera	Dipsadoboa weileri	Boaedon lineatus
Causus resimus	Causus lichtensteinii	Bothrophthalmus brunneus	Buhoma depressiceps	Causus rhombeatus	Atractaspis aterrima	Dispholidus typus	Boaedon olivaceus
Causus rhombeatus	Causus maculatus	Broadleysaurus major	Causus lichtensteinii	Chamaeleo dilepis	Atractaspis bipostocularis	Elapsoidea loveridgei	Bothrophthalmus lineatus
Chamaeleo dilepis	Causus resimus	Buhoma depressiceps	Causus maculatus	Chamaeleo gracilis	Atractaspis irregularis	Hapsidophrys lineatus	Broadleysaurus major
Chamaeleo gracilis	Causus rhombeatus	Causus lichtensteinii	Causus resimus	Chamaeleo laevigatus	Atractaspis loveridgei	Hapsidophrys smaragdinus	Buhoma depressiceps
Chamaeleo laevigatus	Chamaeleo dilepis	Causus resimus	Causus rhombeatus	Chamaelycus fasciatus	Bitis arietans	Heliobolus spekii	Causus lichtensteinii
Chamaelycus fasciatus	Chamaeleo gracilis	Causus rhombeatus	Chamaeleo dilepis	Chamaesaura tenuior	Bitis gabonica	Hemidactylus angulatus	Causus maculatus
Chamaesaura tenuior	Chamaeleo laevigatus	Chamaeleo dilepis	Chamaeleo laevigatus	Chilorhinophis butleri	Bitis nasicornis	Hemidactylus mabouia	Causus resimus
Congolacerta vauereselli	Chamaelycus fasciatus	Chamaeleo gracilis	Chamaesaura tenuior	Congolacerta vauereselli	Boaedon fuliginosus	Hormonotus modestus	Causus rhombeatus
Crocodylus niloticus	Chamaesaura tenuior	Chamaeleo laevigatus	Congolacerta vauereselli	Crocodylus niloticus	Boaedon lineatus	Kinixys belliana	Chamaeleo dilepis
Crotaphopeltis degeni	Congolacerta vauereselli	Chamaeleo quilensis	Crocodylus niloticus	Crotaphopeltis degeni	Boaedon olivaceus	Kinixys erosa	Chamaeleo gracilis
Crotaphopeltis hotamboeia	Crocodylus niloticus	Chamaeleo senegalensis	Crotaphopeltis degeni	Crotaphopeltis hotamboeia	Boaedon radfordi	Kinyongia tolleyae	Chamaeleo laevigatus
Dasypeltis atra	Crotaphopeltis degeni	Chamaesaura anguina	Crotaphopeltis hotamboeia	Dasypeltis atra	Bothrophthalmus lineatus	Kinyongia xenorhina	Chamaeleo quilensis
Dasypeltis confusa	Crotaphopeltis hotamboeia	Chamaesaura tenuior	Dasypeltis atra	Dasypeltis confusa	Broadleysaurus major	Leptosiaphos meleagris	Chamaeleo senegalensis
Dasypeltis fasciata	Dasypeltis atra	Congolacerta vauereselli	Dasypeltis confusa	Dasypeltis fasciata	Buhoma depressiceps	Limaformosa savorgnani	Chamaelycus fasciatus
Dasypeltis scabra	Dasypeltis confusa	Crocodylus niloticus	Dasypeltis fasciata	Dasypeltis scabra	Causus lichtensteinii	Lycophidion capense	Chamaesaura anguina
Dendroaspis jamesoni	Dasypeltis fasciata	Crocodylus suchus	Dasypeltis scabra	Dendroaspis jamesoni	Causus maculatus	Lycophidion ornatum	Chamaesaura tenuior
Dendroaspis polylepis	Dasypeltis scabra	Crotaphopeltis degeni	Dendroaspis jamesoni	Dendroaspis polylepis	Causus resimus	Lygodactylus capensis	Congolacerta vauereselli
Dipsadoboa unicolor	Dendroaspis jamesoni	Crotaphopeltis hippocrepis	Dendroaspis polylepis	Dipsadoboa unicolor	Causus rhombeatus	Lygodactylus gutturalis	Crocodilus kaisensis
Dipsadoboa weileri	Dendroaspis polylepis	Dasypeltis atra	Dipsadoboa unicolor	Dipsadoboa weileri	Chamaeleo chamaeleon	Meizodon regularis	Crocodylus niloticus
Dispholidus typus	Dipsadoboa unicolor	Dasypeltis fasciata	Dipsadoboa weileri	Dispholidus typus	Chamaeleo dilepis	Mochlus hinkeli	Crocodylus nkondoensis
Duberria lutrix	Dipsadoboa weileri	Dasypeltis gansi	Dispholidus typus	Duberria lutrix	Chamaeleo gracilis	Naja haje	Crotaphopeltis degeni
Elapsoidea laticincta	Dispholidus kivuensis	Dasypeltis medici	Duberria lutrix	Echis pyramidum	Chamaeleo graueri	Naja nigricollis	Crotaphopeltis hotamboeia
Elapsoidea loveridgei	Duberria shirana	Dasypeltis scabra	Echis pyramidum	Elapsoidea laticincta	Chamaeleo laevigatus	Naja subfulva	Dasypeltis atra
Eryx colubrinus	Elapsoidea laticincta	Dendroaspis jamesoni	Elapsoidea laticincta	Elapsoidea loveridgei	Chamaeleo quilensis	Pelomedusa neumanni	Dasypeltis fasciata
Feylinia currori	Elapsoidea loveridgei	Dendroaspis polylepis	Elapsoidea loveridgei	Gerrhosaurus nigrolineatus	Chamaeleo roperi	Pelomedusa subrufa	Dasypeltis gansi
Gerrhosaurus flavigularis	Elapsoidea semiannulata	Dipsadoboa unicolor	Eumecia anchietae	Gonionotophis brussauxi	Chamaeleo senegalensis	Pelusios williamsi	Dasypeltis scabra
Gerrhosaurus nigrolineatus	Eryx colubrinus	Duberria lutrix	Feylinia currori	Grayia smithii	Chamaesaura anguina	Philothamnus heterolepidotus	Dendroaspis angusticeps
Gonionotophis brussauxi	Feylinia currori	Elapsoidea guentherii	Gerrhosaurus flavigularis	Grayia tholloni	Chamaesaura tenuior	Philothamnus hughesi	Dendroaspis jamesoni
Grayia smithii	Gerrhosaurus flavigularis	Elapsoidea loveridgei	Gerrhosaurus intermedius	Hapsidophrys lineatus	Congolacerta vauereselli	Philothamnus nitidus	Dendroaspis kaimosae
Grayia tholloni	Gerrhosaurus intermedius	Elapsoidea moebiusi	Gonionotophis brussauxi	Hapsidophrys smaragdinus	Crotaphopeltis degeni	Philothamnus ruandae	Dendroaspis polylepis
Hapsidophrys lineatus	Gonionotophis brussauxi	Elapsoidea semiannulata	Grayia smithii	Heliobolus nitidus	Crotaphopeltis hotamboeia	Philothamnus semivariegatus	Dipsadoboa unicolor
Hapsidophrys smaragdinus	Grayia smithii	Eryx colubrinus	Grayia tholloni	Heliobolus spekii	Dasypeltis atra	Polemon collaris	Dispholidus typus
Heliobolus nitidus	Grayia tholloni	Eumecia anchietae	Hapsidophrys lineatus	Hemidactylus angulatus	Dasypeltis fasciata	Pseudohaje goldii	Duberria abyssinica
Heliobolus spekii	Hapsidophrys lineatus	Feylinia currori	Hapsidophrys smaragdinus	Hemidactylus squamulatus	Dasypeltis gansi	Python regius	Duberria atriventris
Hemidactylus angulatus	Hapsidophrys smaragdinus	Gerrhosaurus nigrolineatus	Heliobolus spekii	Hemirhagerrhis nototaenia	Dasypeltis palmarum	Python sebae	Duberria lutrix
Hemidactylus mabouia	Heliobolus nitidus	Gonionotophis brussauxi	Hemidactylus angulatus	Holaspis guentheri	Dasypeltis scabra	Rhamnophis aethiopissa	Duberria shirana
Hemidactylus richardsonii	Heliobolus spekii	Grayia smithii	Hemidactylus mabouia	Holaspis laevis	Dendroaspis angusticeps	Rhampholeon boulengeri	Elapsoidea guntherii
Holaspis guentheri	Hemidactylus angulatus	Grayia tholloni	Hemidactylus richardsonii	Hormonotus modestus	Dendroaspis jamesoni	Scaphiophis albopunctatus	Elapsoidea loveridgei
Hormonotus modestus	Hemidactylus mabouia	Hapsidophrys lineatus	Hemirhagerrhis kelleri	Kinixys belliana	Dendroaspis kaimosae	Stigmochelys pardalis	Elapsoidea multicincta
Kinixys belliana	Hemidactylus richardsonii	Hapsidophrys smaragdinus	Hemirhagerrhis nototaenia	Kinixys erosa	Dendroaspis polylepis	Thelotornis kirtlandii	Elapsoidea sundevallii
Kinixys erosa	Hemirhagerrhis kelleri	Heliobolus sextaeniatus	Holaspis guentheri	Kinixys spekii	Dipsadoboa unicolor	Thrasops jacksonii	Eryx colubrinus
Kinixys spekii	Holaspis guentheri	Heliobolus spekii	Hormonotus modestus	Kinyongia adolfifriderici	Dipsadoboa viridiventris	Toxicodryas adamanteus	Eumecia anchietae
Kinyongia adolfifriderici	Hormonotus modestus	Hemidactylus brookii	Kinixys erosa	Kinyongia carpenteri	Dispholidus punctatus	Toxicodryas vexator	Feylinia currori
Kinyongia carpenteri	Kinixys belliana	Hemidactylus longicephalus	Kinyongia adolfifriderici	Kinyongia tolleyae	Dispholidus typus	Trachylepis maculilabris	Feylinia elegans
Kinyongia xenorhina	Kinixys erosa	Hemidactylus platycephalus	Kinyongia carpenteri	Kinyongia xenorhina	Duberria abyssinica	Trachylepis quinquetaeniata	Gerrhosaurus nigrolineatus
Latastia longicaudata	Kinixys nogueyi	Hemidactylus richardsonii	Kinyongia xenorhina	Kladirostratus acutus	Duberria atriventris	Trachylepis striata	Gonionotophis brussauxi
Leptosiaphos aloysiisabaudiae	Kinyongia carpenteri	Hemidactylus tenkatei	Kladirostratus togoensis	Kladirostratus togoensis	Duberria lutrix	Trioceros ellioti	Grayia smithii
Leptosiaphos graueri	Kinyongia tolleyae	Holaspis guentheri	Leptosiaphos aloysiisabaudiae	Leptosiaphos aloysiisabaudiae	Elapsoidea colleti	Trioceros hoehnelii	Grayia tholloni
Leptosiaphos hackarsi	Kinyongia xenorhina	Hormonotus modestus	Leptosiaphos graueri	Leptosiaphos graueri	Elapsoidea guntherii	Trioceros johnstoni	Hapsidophrys lineatus
Leptosiaphos kilimensis	Kladirostratus togoensis	Kinixys erosa	Leptosiaphos hackarsi	Leptosiaphos hackarsi	Elapsoidea loveridgei	Trioceros rudis	Hapsidophrys smaragdinus
Leptosiaphos meleagris	Latastia longicaudata	Kinixys lobatsiana	Leptosiaphos kilimensis	Leptosiaphos meleagris	Elapsoidea multicincta	Varanus niloticus	Heliobolus sextaeniatus
Leptotyphlops emini	Leptosiaphos aloysiisabaudiae	Kinyongia adolfifriderici	Leptosiaphos meleagris	Leptotyphlops emini	Elapsoidea sundevallii		Heliobolus spekii
Leptotyphlops pitmani	Leptosiaphos graueri	Kinyongia tavetana	Leptotyphlops emini	Leptotyphlops pitmani	Eryx colubrinus		Hemidactylus angulatus
Letheobia graueri	Leptosiaphos hackarsi	Kinyongia xenorhina	Leptotyphlops pitmani	Letheobia graueri	Feylinia currori		Hemidactylus brookii
Limaformosa chanleri	Leptosiaphos kilimensis	Latastia doriai	Letheobia graueri	Letheobia pallida	Gerrhosaurus nigrolineatus		Hemidactylus haitianus
Limaformosa savorgnani	Leptosiaphos meleagris	Leptosiaphos aloysiisabaudiae	Limaformosa chanleri	Limaformosa capensis	Gonionotophis brussauxi		Hemidactylus kelleri
Lycophidion capense	Leptotyphlops emini	Leptosiaphos graueri	Limaformosa savorgnani	Limaformosa savorgnani	Grayia smithii		Hemidactylus mabouia
Lycophidion depressirostre	Leptotyphlops pitmani	Leptosiaphos hackarsi	Lycophidion capense	Lycophidion capense	Grayia tholloni		Hemidactylus richardsonii
Lycophidion laterale	Letheobia graueri	Leptosiaphos kilimensis	Lycophidion depressirostre	Lycophidion depressirostre	Hapsidophrys lineatus		Holaspis guentheri
Lycophidion ornatum	Limaformosa chanleri	Leptosiaphos meleagris	Lycophidion laterale	Lycophidion jacksoni	Hapsidophrys smaragdinus		Hormonotus modestus
Lygodactylus gutturalis	Limaformosa savorgnani	Leptotyphlops incognitus	Lycophidion ornatum	Lycophidion laterale	Heliobolus sextaeniatus		Kinixys belliana
Lygodactylus keniensis	Lycophidion depressirostre	Leptotyphlops mbanjensis	Lygodactylus gutturalis	Lycophidion ornatum	Heliobolus spekii		Kinixys erosa
Mehelya poensis	Lycophidion jacksoni	Leptotyphlops nigricans	Lygodactylus keniensis	Lygodactylus keniensis	Hemidactylus angulatus		Kinyongia adolfifriderici
Mehelya stenopthalmus	Lycophidion laterale	Limaformosa capensis	Mehelya poensis	Lygodactylus picturatus	Hemidactylus brookii		Kinyongia tavetana
Meizodon regularis	Lycophidion ornatum	Lycophidion depressirostre	Mehelya stenopthalmus	Mehelya poensis	Hemidactylus frenatus		Kinyongia xenorhina
Micrelaps vaillanti	Lygodactylus gutturalis	Lycophidion laterale	Meizodon regularis	Mehelya stenopthalmus	Hemidactylus kelaartii		Leptosiaphos aloysiisabaudiae
Mochlus afer	Lygodactylus keniensis	Lycophidion ornatum	Meizodon semiornatus	Meizodon semiornatus	Hemidactylus mabouia		Leptosiaphos graueri
Mochlus hinkeli	Mehelya poensis	Lygodactylus gutturalis	Micrelaps vaillanti	Micrelaps vaillanti	Hemidactylus platycephalus		Leptosiaphos hackarsi
Mochlus sundevallii	Mehelya stenopthalmus	Lygodactylus scorteccii	Mochlus afer	Mochlus hinkeli	Hemidactylus richardsonii		Leptosiaphos kilimensis
Naja ashei	Meizodon regularis	Lygosoma opisthorhodum	Mochlus guineensis	Mochlus sundevallii	Holaspis guentheri		Leptosiaphos meleagris
Naja haje	Micrelaps vaillanti	Mehelya poensis	Mochlus hinkeli	Naja ashei	Hormonotus modestus		Leptotyphlops conjunctus
Naja melanoleuca	Mochlus hinkeli	Mehelya stenopthalmus	Mochlus sundevallii	Naja haje	Kinyongia adolfifriderici		Leptotyphlops emini
Naja nigricollis	Mochlus sundevallii	Meizodon coronatus	Naja ashei	Naja nigricollis	Kinyongia carpenteri		Leptotyphlops nigricans
Natriciteres olivacea	Naja ashei	Meizodon regularis	Naja haje	Naja subfulva	Kinyongia tavetana		Limaformosa capensis
Osteolaemus tetraspis	Naja haje	Meizodon semiornatus	Naja nigricollis	Natriciteres olivacea	Kinyongia tolleyae		Limaformosa savorgnani
Panaspis wahlbergii	Naja nigricollis	Micrelaps boettgeri	Naja subfulva	Nucras boulengeri	Kinyongia xenorhina		Lycophidion capense
Pelomedusa neumanni	Naja subfulva	Mochlus afer	Natriciteres olivacea	Osteolaemus tetraspis	Latastia longicaudata		Lycophidion intermediates
Pelusios adansonii	Natriciteres olivacea	Mochlus fernandi	Nucras boulengeri	Pelusios rhodesianus	Leptosiaphos aloysiisabaudiae		Lycophidion jacksoni
Pelusios chapini	Osteolaemus osborni	Mochlus hinkeli	Osteolaemus tetraspis	Pelusios williamsi	Leptosiaphos graueri		Lycophidion laterale
Pelusios gabonensis	Panaspis wahlbergii	Mochlus sundevallii	Panaspis helleri	Philothamnus battersbyi	Leptosiaphos hackarsi		Lycophidion ornatum
Pelusios rhodesianus	Pelomedusa neumanni	Naja arabica	Pelusios rhodesianus	Philothamnus bequaerti	Leptosiaphos kilimensis		Lygodactylus gutturalis
Pelusios williamsi	Pelomedusa schweinfurthi	Naja ashei	Philothamnus angolensis	Philothamnus carinatus	Leptosiaphos meleagris		Lygodactylus picturatus
Philothamnus angolensis	Pelusios chapini	Naja atra	Philothamnus battersbyi	Philothamnus heterodermus	Leptotyphlops conjunctus		Mehelya poensis
Philothamnus battersbyi	Pelusios gabonensis	Naja melanoleuca	Philothamnus bequaerti	Philothamnus heterolepidotus	Leptotyphlops emini		Mehelya stenopthalmus
Philothamnus bequaerti	Pelusios rhodesianus	Naja nubiae	Philothamnus carinatus	Philothamnus hughesi	Leptotyphlops nigricans		Meizodon coronatus
Philothamnus carinatus	Pelusios williamsi	Naja pallida	Philothamnus heterodermus	Philothamnus ruandae	Leptotyphlops scutifrons		Meizodon regularis
Philothamnus heterodermus	Philothamnus angolensis	Natriciteres bipostocularis	Philothamnus heterolepidotus	Platyceps florulentus	Letheobia graueri		Mochlus afer
Philothamnus heterolepidotus	Philothamnus battersbyi	Nucras boulengeri	Philothamnus hoplogaster	Polemon christyi	Limaformosa capensis		Mochlus fernandi
Philothamnus hoplogaster	Philothamnus bequaerti	Panaspis helleri	Philothamnus hughesi	Polemon collaris	Limaformosa savorgnani		Mochlus hinkeli
Philothamnus hughesi	Philothamnus carinatus	Panaspis wahlbergii	Philothamnus nitidus	Polemon fulvicollis	Lycophidion capense		Mochlus sundevallii
Philothamnus nitidus	Philothamnus heterodermus	Pelomedusa subrufa	Philothamnus ruandae	Polemon graueri	Lycophidion jacksoni		Naja arabica
Philothamnus ruandae	Philothamnus heterolepidotus	Pelusios gabonensis	Philothamnus semivariegatus	Prosymna ambigua	Lycophidion laterale		Naja ashei
Philothamnus semivariegatus	Philothamnus hoplogaster	Pelusios niger	Platyceps brevis	Prosymna greigerti	Lycophidion ornatum		Naja haje
Platyceps florulentus	Philothamnus hughesi	Pelusios rhodesianus	Platyceps florulentus	Psammophis biseriatus	Lygodactylus gutturalis		Naja melanoleuca
Polemon christyi	Philothamnus nitidus	Pelusios sinuatus	Polemon christyi	Psammophis lineatus	Lygodactylus keniensis		Naja naja
Polemon collaris	Philothamnus ruandae	Pelusios subniger	Polemon collaris	Psammophis mossambicus	Lygodactylus manni		Naja nigricollis
Polemon fulvicollis	Philothamnus semivariegatus	Pelusios williamsi	Polemon fulvicollis	Psammophis punctulatus	Lygodactylus methueni		Natriciteres olivacea
Polemon gabonensis	Platyceps florulentus	Philothamnus angolensis	Polemon gabonensis	Psammophis sudanensis	Lygodactylus picturatus		Nucras boulengeri
Polemon graueri	Polemon christyi	Philothamnus battersbyi	Polemon graueri	Psammophis tanganicus	Mehelya poensis		Osteolaemus tetraspis
Prosymna ambigua	Polemon collaris	Philothamnus bequaerti	Prosymna ambigua	Psammophylax variabilis	Mehelya stenopthalmus		Pelomedusa subrufa
Prosymna greigerti	Polemon fulvicollis	Philothamnus carinatus	Prosymna greigerti	Pseudohaje goldii	Meizodon coronatus		Pelusios laurenti
Psammophis lineatus	Polemon gabonensis	Philothamnus emini	Psammophis lineatus	Python regius	Meizodon regularis		Pelusios lutescens
Psammophis mossambicus	Polemon graueri	Philothamnus girardi	Psammophis mossambicus	Python sebae	Meizodon semiornatus		Pelusios niger
Psammophis punctulatus	Prosymna ambigua	Philothamnus heterodermus	Psammophis rukwae	Rhamnophis aethiopissa	Micrelaps boettgeri		Pelusios subniger
Psammophis rukwae	Psammophis lineatus	Philothamnus heterolepidotus	Psammophis sudanensis	Rhamphiophis oxyrhynchus	Mochlus afer		Pelusios williamsi
Psammophis sudanensis	Psammophis mossambicus	Philothamnus hoplogaster	Pseudohaje goldii	Rhamphiophis rostratus	Mochlus fernandi		Philothamnus angolensis
Psammophylax togoensis	Psammophis rukwae	Philothamnus hughesi	Python regius	Rhamphiophis rubropunctatus	Mochlus hinkeli		Philothamnus battersbyi
Pseudohaje goldii	Psammophis sudanensis	Philothamnus irregularis	Python sebae	Rhampholeon boulengeri	Mochlus sundevallii		Philothamnus bequaerti
Python regius	Psammophis tanganicus	Philothamnus ornatus	Rhamnophis aethiopissa	Scaphiophis albopunctatus	Naja arabica		Philothamnus carinatus
Python sebae	Psammophis trivirgatus	Polemon christyi	Rhamphiophis oxyrhynchus	Scaphiophis raffreyi	Naja ashei		Philothamnus dorsalis
Rhamnophis aethiopissa	Pseudohaje goldii	Polemon collaris	Rhamphiophis rostratus	Stigmochelys pardalis	Naja haje		Philothamnus heterodermus
Rhamphiophis oxyrhynchus	Python regius	Polemon fulvicollis	Rhampholeon boulengeri	Tarentola annularis	Naja melanoleuca		Philothamnus heterolepidotus
Rhamphiophis rostratus	Python sebae	Prosymna ambigua	Scaphiophis albopunctatus	Telescopus dhara	Naja mossambica		Philothamnus hoplogaster
Rhampholeon boulengeri	Rhamnophis aethiopissa	Prosymna greigerti	Scaphiophis raffreyi	Telescopus obtusus	Naja naja		Philothamnus irregularis
Scaphiophis albopunctatus	Rhamphiophis oxyrhynchus	Psammophis lineatus	Stigmochelys pardalis	Thelotornis kirtlandii	Naja nigricollis		Philothamnus ornatus
Scaphiophis raffreyi	Rhamphiophis rostratus	Psammophis phillipsi	Telescopus obtusus	Thrasops jacksonii	Naja subfulva		Philothamnus ruandae
Stigmochelys pardalis	Rhampholeon boulengeri	Psammophis punctulatus	Thelotornis kirtlandii	Toxicodryas blandingii	Natriciteres olivacea		Philothamnus semivariegatus
Telescopus dhara	Scaphiophis albopunctatus	Psammophis rukwae	Thrasops jacksonii	Toxicodryas pulverulenta	Nucras boulengeri		Polemon christyi
Thelotornis kirtlandii	Scaphiophis raffreyi	Psammophis subtaeniatus	Toxicodryas blandingii	Trachylepis albilabris	Panaspis wahlbergii		Polemon collaris
Thrasops jacksonii	Stigmochelys pardalis	Psammophylax variabilis	Toxicodryas pulverulenta	Trachylepis bayonii	Philothamnus angolensis		Polemon fulvicollis
Toxicodryas blandingii	Tarentola annularis	Pseudohaje goldii	Trachylepis albilabris	Trachylepis brevicollis	Philothamnus battersbyi		Polemon gabonensis
Toxicodryas pulverulenta	Telescopus obtusus	Python natalensis	Trachylepis bayonii	Trachylepis irregularis	Philothamnus bequaerti		Polemon graueri
Trachylepis albilabris	Thelotornis kirtlandii	Rhamnophis aethiopissa	Trachylepis brevicollis	Trachylepis loluiensis	Philothamnus carinatus		Prosymna ambigua
Trachylepis brevicollis	Thrasops jacksonii	Rhamphiophis oxyrhynchus	Trachylepis irregularis	Trachylepis maculilabris	Philothamnus heterodermus		Psammophis lineatus
Trachylepis loluiensis	Toxicodryas adamanteus	Rhampholeon boulengeri	Trachylepis loluiensis	Trachylepis megalura	Philothamnus heterolepidotus		Psammophis phillipsi
Trachylepis maculilabris	Toxicodryas vexator	Rhampholeon spectrum	Trachylepis maculilabris	Trachylepis perrotetii	Philothamnus hoplogaster		Psammophis rukwae
Trachylepis megalura	Trachylepis albilabris	Rieppeleon kerstenii	Trachylepis megalura	Trachylepis planifrons	Philothamnus hughesi		Psammophis sibilans
Trachylepis perrotetii	Trachylepis bayonii	Scaphiophis albopunctatus	Trachylepis perrotetii	Trachylepis quinquetaeniata	Philothamnus irregularis		Psammophis subtaeniatus
Trachylepis planifrons	Trachylepis brevicollis	Stigmochelys pardalis	Trachylepis planifrons	Trachylepis striata	Philothamnus nitidus		Pseudohaje goldii
Trachylepis quinquetaeniata	Trachylepis irregularis	Telescopus dhara	Trachylepis quinquetaeniata	Trachylepis varia	Philothamnus ornatus		Python sebae
Trachylepis striata	Trachylepis loluiensis	Telescopus semiannulatus	Trachylepis striata	Trioceros bitaeniatus	Philothamnus ruandae		Rhamnophis aethiopissa
Trachylepis varia	Trachylepis maculilabris	Thelotornis capensis	Trachylepis varia	Trioceros conirostratus	Philothamnus semivariegatus		Rhamnophis elgonensis
Trioceros bitaeniatus	Trachylepis margaritifer	Thelotornis kirtlandii	Trioceros bitaeniatus	Trioceros ellioti	Polemon christyi		Rhamphiophis oxyrhynchus
Trioceros conirostratus	Trachylepis megalura	Thelotornis oatesi	Trioceros conirostratus	Trioceros hoehnelii	Polemon collaris		Rhampholeon boulengeri
Trioceros ellioti	Trachylepis perrotetii	Thrasops jacksonii	Trioceros ellioti	Trioceros jacksonii	Polemon fulvicollis		Rhampholeon spectrum
Trioceros hoehnelii	Trachylepis planifrons	Toxicodryas blandingii	Trioceros hoehnelii	Trioceros johnstoni	Polemon gabonensis		Rieppeleon kerstenii
Trioceros ituriensis	Trachylepis quinquetaeniata	Toxicodryas pulverulenta	Trioceros ituriensis	Trioceros rudis	Polemon graueri		Scaphiophis albopunctatus
Trioceros johnstoni	Trachylepis striata	Trachylepis brevicollis	Trioceros johnstoni	Varanus albigularis	Prosymna ambigua		Stigmochelys pardalis
Trioceros rudis	Trachylepis varia	Trachylepis homalocephala	Trioceros rudis	Varanus exanthematicus	Prosymna bocagii		Thelotornis kirtlandii
Trionyx triunguis	Trioceros bitaeniatus	Trachylepis irregularis	Trionyx triunguis	Varanus niloticus	Prosymna greigerti		Thrasops aethiopissa
Varanus albigularis	Trioceros conirostratus	Trachylepis maculilabris	Varanus albigularis		Psammophis lineatus		Thrasops jacksonii
Varanus exanthematicus	Trioceros ellioti	Trachylepis margaritifer	Varanus exanthematicus		Psammophis phillipsi		Tomistoma coppensi
Varanus niloticus	Trioceros hoehnelii	Trachylepis quinquetaeniata	Varanus niloticus		Psammophis punctulatus		Toxicodryas blandingii
	Trioceros ituriensis	Trachylepis striata			Psammophis rukwae		Toxicodryas pulverulenta
	Trioceros johnstoni	Trachylepis varia			Psammophis sibilans		Trachylepis brevicollis
	Trioceros rudis	Trioceros bitaeniatus			Psammophis subtaeniatus		Trachylepis homalocephala
	Trionyx triunguis	Trioceros ellioti			Psammophylax variabilis		Trachylepis irregularis
	Varanus albigularis	Trioceros hoehnelii			Pseudohaje goldii		Trachylepis maculilabris
	Varanus exanthematicus	Trioceros ituriensis			Rhamnophis aethiopissa		Trachylepis margaritifer
	Varanus niloticus	Trioceros johnstoni			Rhamnophis elgonensis		Trachylepis megalura
		Trioceros melleri			Rhamphiophis oxyrhynchus		Trachylepis quinquetaeniata
		Trioceros rudis			Rhampholeon boulengeri		Trachylepis striata
		Trionyx triunguis			Rhampholeon spectrum		Trachylepis varia
		Typhlops schlegelii			Scaphiophis albopunctatus		Trioceros altaeelgonis
		Varanus niloticus			Telescopus dhara		Trioceros bitaeniatus
					Telescopus semiannulatus		Trioceros conirostratus
					Thelotornis kirtlandii		Trioceros ellioti
					Thrasops aethiopissa		Trioceros hoehnelii
					Thrasops jacksonii		Trioceros ituriensis
					Thrasops schmidti		Trioceros johnstoni
					Toxicodryas adamanteus		Trioceros melleri
					Toxicodryas blandingii		Trioceros rudis
					Toxicodryas vexator		Trionyx triunguis
					Trachylepis brevicollis		Typhlops dubius
					Trachylepis homalocephala		Varanus niloticus
					Trachylepis irregularis
					Trachylepis loluiensis
					Trachylepis maculilabris
					Trachylepis margaritifer
					Trachylepis quinquetaeniata
					Trachylepis striata
					Trachylepis varia
					Trioceros altaeelgonis
					Trioceros bitaeniatus
					Trioceros conirostratus
					Trioceros ellioti
					Trioceros hoehnelii
					Trioceros ituriensis
					Trioceros jacksonii
					Trioceros johnstoni
					Trioceros melleri
					Trioceros rudis
					Typhlops schlegelii
					Varanus niloticus
